# Supplementary material for: Expanding the clinical and molecular spectrum of ATP6V1A related metabolic cutis laxa
Source: PubMed Central journal article supplement (PMC8638669; doi:10.1002/jimd.12341), 2021-02-04
Supplement: JIMD-44-972-s002.pdf [file JIMD-44-972-s002.pdf]

## Muscle histology B-II-1

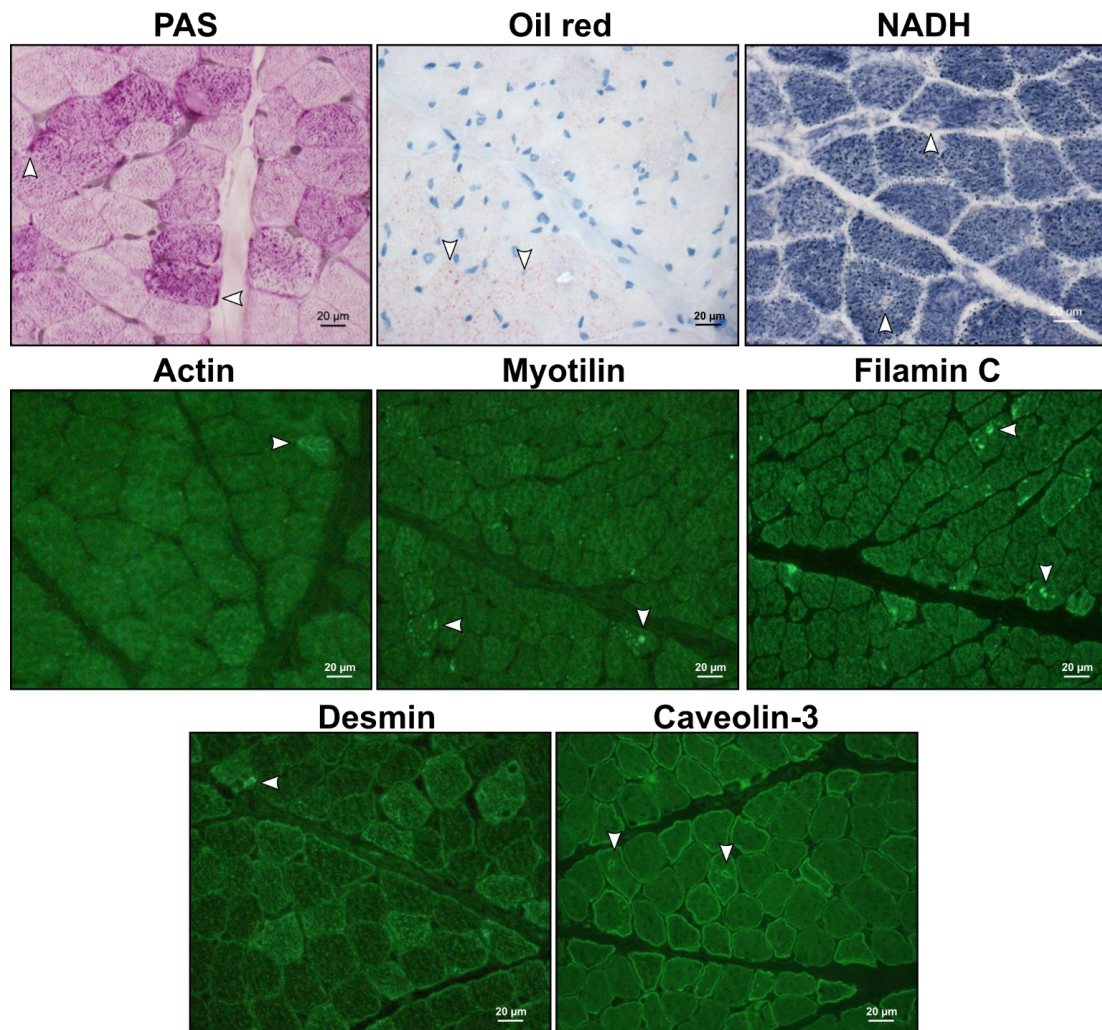

**Supplementary Figure 1:** Histological and immunofluorescence findings from individual B-II-1: The periodic acid–Schiff (PAS) reaction displayed deposits in a proportion of muscle fibres indicative for accumulation of polysaccharide-structures (white arrows). Oil red staining identified muscle cells with sarcoplasmic lipid accumulation (white arrows). NADH-reaction unraveled muscle fibres with reduced focal reactivity (white arrow). Immunofluorescence study of actin shows increased reactivity of in a minority of muscle cells (white arrow). Prominent build-up of deposits of myotilin, filamin C and desmin in a proportion of muscle fibres are respectively highlighted (white arrows). Immunofluorescence studies of caveolin-3 revealed an immunoreactivity of the rim of vacuoles (white arrows). Scale bar: 20 µm
